# Supplementary material
Source: PubMed Central journal article supplement (PMC7771633)
Supplement: NIHMS1647999-supplement-4.pdf [file NIHMS1647999-supplement-4.pdf]

# Supplemental Figure S4, Related to Figures 3 and 4

## A. HENV-26 and HeV G complex

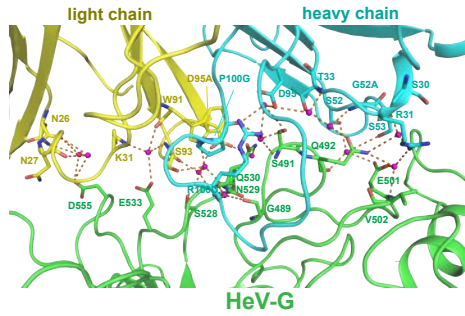

## B. HENV-32 and HeV G complex

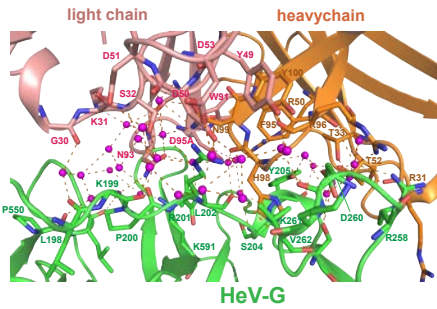

## C. Binding to CedV or GhV

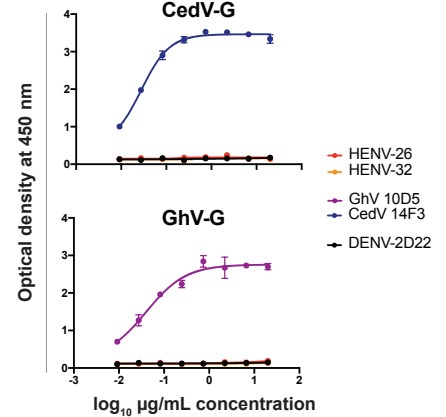

## D. Sequence alignment of five henipavirus G proteins

### Residues on HeV-G or NiV<sub>M</sub>-G recognized by mAb HENV-26, HENV-32 or m102.3

|                     |                                                                            |     |
|---------------------|----------------------------------------------------------------------------|-----|
| HeV-G               | VGLPNOICLOKTTSTILKPRLSYTLPIINTREGVCTDPLAVDNGFFAYSHLEKIGSGTRGIAKORIIIGV     | 252 |
| NiV <sub>M</sub> -G | VGLPNNICLOKTSNQILKPKLSYTLPLVVGQSGTCTDPLAMDEGYFAYSHLERIGSGSRGVSKORIIIGV     | 252 |
| NiV <sub>S</sub> -G | VGLPNNICLOKTSNQILKPKLSYTLPLVVGQSGTCTDPLAMDEGYFAYSHLERIGSGSRGVSKORIIIGV     | 252 |
| CedV-G              | AGPPKIFCKSVSKDPDFRLKQDVIYLVQDQRSICMNNPLDISDGFYIHYEGINSCKKSDSFKVLLSH        | 275 |
| GhV-G               | VAHGSPSCRFNFSSVPTIYYRIPGLYNRTALDERCLNPRITISSTKFAVYHSEYDKNCTRGFKYYELMTF     | 268 |
| HeV-G               | GEVLDRGGDKVPSMFMNTNVTWTPPNPSTIHHCSSYTHEDFYITLCAVSHVGDPIINSTSWTESLSLIRLAVRP | 323 |
| NiV <sub>M</sub> -G | GEVLDRGGDEVPFLFMTNVTWTPPNPNTVYHCSAYYNNFEYVLCAYSTVGDPIINSTYWSGLMMTRLAVKP    | 323 |
| NiV <sub>S</sub> -G | GEVLDRGGDEVPFLFMTNVTWTPPNPNTVYHCSAYYNNFEYVLCAYSTVGDPIINSTYWSGLMMTRLAVKP    | 323 |
| CedV-G              | GEIVDRGGDVRPFLYLLSSHYHFSMQVINGVPTCNQSSFFVCHISNNTKTLDSYSSDEYYIYFNGID        | 346 |
| GhV-G               | GEILEGPEKERMFSRSFYSTNAVNYHSTPIVTVNEGFLCLECTSSDPLKANKLSNSTFFHLVIRHNK        | 339 |
| HeV-G               | KSDSGDYNQYIAITKVERGKDKVMPYGPSSGIKOGDTLYFPAVGFVLRTEFYQYDNSNCPIIHK...YS      | 390 |
| NiV <sub>M</sub> -G | KNSGGYVNHQALALRSIEKGRDKVMPYGPSSGIKOGDTLYFPAVGFVLRTEFYQYDNSNCPITK...YS      | 390 |
| NiV <sub>S</sub> -G | KNSGGYVNHQALALRSIEKGRDKVMPYGPSSGIKOGDTLYFPAVGFVLRTEFYQYDNSNCPITK...YS      | 390 |
| CedV-G              | RPKTKKIPINMTADN...RIHFHTFSGGVCLGEEFIIVTTVINTDVFTHD...YCESFNSVQTGKS         | 411 |
| GhV-G               | DEKIVSMPSFNLSLTDQ...EIVQIIAEGGGTAESGNLYFPCIGRLHKKRVTHP...LCKKSN...RT       | 400 |
| HeV-G               | KAENCRLSMGLRPNNSHYILRSGLLKYNLSDGENPKVVFIEISDQRLSIGSPSKIYDSLGPVVFYQASFSWD   | 461 |
| NiV <sub>M</sub> -G | KPENCRLSMGLRPNNSHYILRSGLLKYNLSDGENPKVVFIEISDQRLSIGSPSKIYDSLGPVVFYQASFSWD   | 461 |
| NiV <sub>S</sub> -G | KPENCRLSMGLRPNNSHYILRSGLLKYNLSDGENPKVVFIEISDQRLSIGSPSKIYDSLGPVVFYQASFSWD   | 461 |
| CedV-G              | LKEICSELSRPTNSSRYNLNGLIMISQNMDFKIQLNGTYNKLSPSGRSLKTLGGVLYVGSMSWD           | 482 |
| GhV-G               | DDSECLSKSYVYVQGGSPQHGVNCLIRIRNAQRDPTWVITVDLNTYPSRSRIFGFSKFMMLYVSSVSWH      | 471 |
| HeV-G               | TMIKLGDVDTVDPRLVQRNNSVTSRPGGSCQPRFNVCPEVCEWETVYNDVAFILDRLNWVSAGVYINSNOTA   | 532 |
| NiV <sub>M</sub> -G | TMIKFGDVLTVNPLVNNWRDNTVTSRPGGSCQPRFNVCPEVCEWETVYNDVAFILDRINWISAGVYINSNOTA  | 532 |
| NiV <sub>S</sub> -G | TMIKFGDVLTVNPLVNNWRDNTVTSRPGGSCQPRFNVCPEVCEWETVYNDVAFILDRINWISAGVYINSNOTA  | 532 |
| CedV-G              | TYLKAQFVFKWKPFTPNMNNVTISRPNGNCPHYHCKPEICVYGGTYNDIAPLDLGMVYVYVILDSDLA       | 553 |
| GhV-G               | TLLQVAEITDLKDYQLDLDTPTYISRPGGSECFGNVYCTVCEWETVYNDVYVSLTPNNDLTVYVYKSEVA     | 542 |
| HeV-G               | ENPVFAVFKDNEILYQVPLAEDDTNAQKTIITDCFLLENVIWICISLVEYDTGDSVIRPKLFAVKIPEQDSE   | 603 |
| NiV <sub>M</sub> -G | ENPVFTVFKDNEILYRAQLASEDTNAQKTIITNCFLLNKIWICISLVEYDTGDNVIRPKLFAVKIPEQDSE    | 602 |
| NiV <sub>S</sub> -G | ENPVFTVFKDNEILYRAQLASEDTNAQKTIITNCFLLNKIWICISLVEYDTGDNVIRPKLFAVKIPEQDSE    | 602 |
| CedV-G              | ENPFIYVNSTTILYKERVSKDELNTRSTITSCFLFLDEPWCISVLETNRFNGKSIIRPEIYSYKLPKY...    | 622 |
| GhV-G               | ENPVFAIISRDQILKEFFLDAWISSARTTISCFMNFNIWICIAALEITRLNNDIIRPIYYSFWLTDQRT      | 613 |

Contact residues on G for indicated mAb

- m102.3 (purple line)
- HENV-32 (orange box)
- HENV-26 (red box)

### Residues on HeV-G or NiV<sub>M</sub>-G contacting ephrinB2 or ephrinB3 receptor

|                     |                                                                            |     |
|---------------------|----------------------------------------------------------------------------|-----|
| HeV-G               | VGLPNOICLOKTTSTILKPRLSYTLPIINTREGVCTDPLAVDNGFFAYSHLEKIGSGTRGIAKORIIIGV     | 252 |
| NiV <sub>M</sub> -G | VGLPNNICLOKTSNQILKPKLSYTLPLVVGQSGTCTDPLAMDEGYFAYSHLERIGSGSRGVSKORIIIGV     | 252 |
| NiV <sub>S</sub> -G | VGLPNNICLOKTSNQILKPKLSYTLPLVVGQSGTCTDPLAMDEGYFAYSHLERIGSGSRGVSKORIIIGV     | 252 |
| CedV-G              | AGPPKIFCKSVSKDPDFRLKQDVIYLVQDQRSICMNNPLDISDGFYIHYEGINSCKKSDSFKVLLSH        | 275 |
| GhV-G               | VAHGSPSCRFNFSSVPTIYYRIPGLYNRTALDERCLNPRITISSTKFAVYHSEYDKNCTRGFKYYELMTF     | 268 |
| HeV-G               | GEVLDRGGDKVPSMFMNTNVTWTPPNPSTIHHCSSYTHEDFYITLCAVSHVGDPIINSTSWTESLSLIRLAVRP | 323 |
| NiV <sub>M</sub> -G | GEVLDRGGDEVPFLFMTNVTWTPPNPNTVYHCSAYYNNFEYVLCAYSTVGDPIINSTYWSGLMMTRLAVKP    | 323 |
| NiV <sub>S</sub> -G | GEVLDRGGDEVPFLFMTNVTWTPPNPNTVYHCSAYYNNFEYVLCAYSTVGDPIINSTYWSGLMMTRLAVKP    | 323 |
| CedV-G              | GEIVDRGGDVRPFLYLLSSHYHFSMQVINGVPTCNQSSFFVCHISNNTKTLDSYSSDEYYIYFNGID        | 346 |
| GhV-G               | GEILEGPEKERMFSRSFYSTNAVNYHSTPIVTVNEGFLCLECTSSDPLKANKLSNSTFFHLVIRHNK        | 339 |
| HeV-G               | KSDSGDYNQYIAITKVERGKDKVMPYGPSSGIKOGDTLYFPAVGFVLRTEFYQYDNSNCPIIHK...YS      | 390 |
| NiV <sub>M</sub> -G | KNSGGYVNHQALALRSIEKGRDKVMPYGPSSGIKOGDTLYFPAVGFVLRTEFYQYDNSNCPITK...YS      | 390 |
| NiV <sub>S</sub> -G | KNSGGYVNHQALALRSIEKGRDKVMPYGPSSGIKOGDTLYFPAVGFVLRTEFYQYDNSNCPITK...YS      | 390 |
| CedV-G              | RPKTKKIPINMTADN...RIHFHTFSGGVCLGEEFIIVTTVINTDVFTHD...YCESFNSVQTGKS         | 411 |
| GhV-G               | DEKIVSMPSFNLSLTDQ...EIVQIIAEGGGTAESGNLYFPCIGRLHKKRVTHP...LCKKSN...RT       | 400 |
| HeV-G               | KAENCRLSMGLRPNNSHYILRSGLLKYNLSDGENPKVVFIEISDQRLSIGSPSKIYDSLGPVVFYQASFSWD   | 461 |
| NiV <sub>M</sub> -G | KPENCRLSMGLRPNNSHYILRSGLLKYNLSDGENPKVVFIEISDQRLSIGSPSKIYDSLGPVVFYQASFSWD   | 461 |
| NiV <sub>S</sub> -G | KPENCRLSMGLRPNNSHYILRSGLLKYNLSDGENPKVVFIEISDQRLSIGSPSKIYDSLGPVVFYQASFSWD   | 461 |
| CedV-G              | LKEICSELSRPTNSSRYNLNGLIMISQNMDFKIQLNGTYNKLSPSGRSLKTLGGVLYVGSMSWD           | 482 |
| GhV-G               | DDSECLSKSYVYVQGGSPQHGVNCLIRIRNAQRDPTWVITVDLNTYPSRSRIFGFSKFMMLYVSSVSWH      | 471 |
| HeV-G               | TMIKLGDVDTVDPRLVQRNNSVTSRPGGSCQPRFNVCPEVCEWETVYNDVAFILDRLNWVSAGVYINSNOTA   | 532 |
| NiV <sub>M</sub> -G | TMIKFGDVLTVNPLVNNWRDNTVTSRPGGSCQPRFNVCPEVCEWETVYNDVAFILDRINWISAGVYINSNOTA  | 532 |
| NiV <sub>S</sub> -G | TMIKFGDVLTVNPLVNNWRDNTVTSRPGGSCQPRFNVCPEVCEWETVYNDVAFILDRINWISAGVYINSNOTA  | 532 |
| CedV-G              | TYLKAQFVFKWKPFTPNMNNVTISRPNGNCPHYHCKPEICVYGGTYNDIAPLDLGMVYVYVILDSDLA       | 553 |
| GhV-G               | TLLQVAEITDLKDYQLDLDTPTYISRPGGSECFGNVYCTVCEWETVYNDVYVSLTPNNDLTVYVYKSEVA     | 542 |
| HeV-G               | ENPVFAVFKDNEILYQVPLAEDDTNAQKTIITDCFLLENVIWICISLVEYDTGDSVIRPKLFAVKIPEQDSE   | 603 |
| NiV <sub>M</sub> -G | ENPVFTVFKDNEILYRAQLASEDTNAQKTIITNCFLLNKIWICISLVEYDTGDNVIRPKLFAVKIPEQDSE    | 602 |
| NiV <sub>S</sub> -G | ENPVFTVFKDNEILYRAQLASEDTNAQKTIITNCFLLNKIWICISLVEYDTGDNVIRPKLFAVKIPEQDSE    | 602 |
| CedV-G              | ENPFIYVNSTTILYKERVSKDELNTRSTITSCFLFLDEPWCISVLETNRFNGKSIIRPEIYSYKLPKY...    | 622 |
| GhV-G               | ENPVFAIISRDQILKEFFLDAWISSARTTISCFMNFNIWICIAALEITRLNNDIIRPIYYSFWLTDQRT      | 613 |

HeV-G contacts on indicated receptor

- ephrinB2 (red box)
- ephrinB3 (yellow box)
